# Supplementary material for: Distribution and Correlates of Assertive Community Treatment (ACT) and ACT-Like Programs: Results From the 2015 N-MHSS
Source: Atypon-hosted journal article supplement (doi:10.1176/appi.ps.201700561), 2019-01-03
Supplement: appi.ps.201700561.ds001.pdf [file appi.ps.201700561.ds001.pdf]

| <b>Estimated capacity of known facilities with ACT (assertive community treatment) to serve adults with severe mental disorders meeting criteria for ACT treatment.</b> |                                                       |                                |                                            |                                                         |                                                                                                                                           |
|-------------------------------------------------------------------------------------------------------------------------------------------------------------------------|-------------------------------------------------------|--------------------------------|--------------------------------------------|---------------------------------------------------------|-------------------------------------------------------------------------------------------------------------------------------------------|
|                                                                                                                                                                         | <b>Adults with serious mental illness<sup>a</sup></b> |                                | <b>Adults eligible for ACT<sup>b</sup></b> | <b>Facilities that provide ACT services<sup>c</sup></b> | <b>Proportion of potential available spots in ACT services over the total number of ACT eligible individuals in the state<sup>d</sup></b> |
| <b>State</b>                                                                                                                                                            | <b>Number of persons in thousands</b>                 | <b>95% Confidence Interval</b> | <b>Number of persons in thousands</b>      | <b>Number of facilities</b>                             | <b>%</b>                                                                                                                                  |
| Alabama                                                                                                                                                                 | 170                                                   | 138-209                        | 7.34                                       | 28                                                      | 38.1                                                                                                                                      |
| Alaska                                                                                                                                                                  | 21                                                    | 17-26                          | 0.91                                       | 12                                                      | 131.8                                                                                                                                     |
| Arizona                                                                                                                                                                 | 219                                                   | 178-268                        | 9.46                                       | 57                                                      | 60.3                                                                                                                                      |
| Arkansas                                                                                                                                                                | 117                                                   | 96-141                         | 5.05                                       | 13                                                      | 25.7                                                                                                                                      |
| California                                                                                                                                                              | 1,035                                                 | 908-1,178                      | 44.7                                       | 118                                                     | 26.4                                                                                                                                      |
| Colorado                                                                                                                                                                | 173                                                   | 142-210                        | 7.47                                       | 60                                                      | 80.3                                                                                                                                      |
| Connecticut                                                                                                                                                             | 96                                                    | 77-118                         | 4.15                                       | 17                                                      | 41.0                                                                                                                                      |
| Delaware                                                                                                                                                                | 27                                                    | 22-33                          | 1.17                                       | 5                                                       | 42.7                                                                                                                                      |
| DC                                                                                                                                                                      | 20                                                    | 16-24                          | 0.86                                       | 6                                                       | 69.8                                                                                                                                      |
| Florida                                                                                                                                                                 | 567                                                   | 483-666                        | 24.49                                      | 54                                                      | 22.0                                                                                                                                      |
| Georgia                                                                                                                                                                 | 297                                                   | 247-357                        | 12.83                                      | 31                                                      | 24.2                                                                                                                                      |
| Hawaii                                                                                                                                                                  | 38                                                    | 30-48                          | 1.64                                       | 7                                                       | 42.7                                                                                                                                      |
| Idaho                                                                                                                                                                   | 54                                                    | 45-66                          | 2.33                                       | 35                                                      | 150.2                                                                                                                                     |
| Illinois                                                                                                                                                                | 343                                                   | 292-403                        | 14.82                                      | 46                                                      | 31.0                                                                                                                                      |
| Indiana                                                                                                                                                                 | 237                                                   | 193-290                        | 10.24                                      | 30                                                      | 29.3                                                                                                                                      |
| Iowa                                                                                                                                                                    | 97                                                    | 79-119                         | 4.19                                       | 8                                                       | 19.1                                                                                                                                      |
| Kansas                                                                                                                                                                  | 87                                                    | 70-107                         | 3.76                                       | 8                                                       | 21.3                                                                                                                                      |
| Kentucky                                                                                                                                                                | 169                                                   | 137-207                        | 7.30                                       | 65                                                      | 89.0                                                                                                                                      |
| Louisiana                                                                                                                                                               | 156                                                   | 127-191                        | 6.74                                       | 20                                                      | 29.7                                                                                                                                      |
| Maine                                                                                                                                                                   | 54                                                    | 43-66                          | 2.33                                       | 16                                                      | 68.7                                                                                                                                      |
| Maryland                                                                                                                                                                | 139                                                   | 112-172                        | 6.00                                       | 37                                                      | 61.7                                                                                                                                      |
| MA                                                                                                                                                                      | 205                                                   | 167-250                        | 8.86                                       | 33                                                      | 37.2                                                                                                                                      |
| Michigan                                                                                                                                                                | 329                                                   | 283-383                        | 14.21                                      | 85                                                      | 59.8                                                                                                                                      |
| Minnesota                                                                                                                                                               | 179                                                   | 145-220                        | 7.73                                       | 31                                                      | 40.1                                                                                                                                      |
| Mississippi                                                                                                                                                             | 91                                                    | 73-113                         | 3.93                                       | 17                                                      | 43.3                                                                                                                                      |
| Missouri                                                                                                                                                                | 214                                                   | 175-262                        | 9.24                                       | 44                                                      | 47.6                                                                                                                                      |
| Montana                                                                                                                                                                 | 41                                                    | 34-50                          | 1.77                                       | 6                                                       | 33.9                                                                                                                                      |
| Nebraska                                                                                                                                                                | 62                                                    | 50-76                          | 2.68                                       | 10                                                      | 37.3                                                                                                                                      |
| Nevada                                                                                                                                                                  | 95                                                    | 77-118                         | 4.10                                       | 11                                                      | 26.8                                                                                                                                      |
| NH                                                                                                                                                                      | 57                                                    | 46-70                          | 2.46                                       | 25                                                      | 101.6                                                                                                                                     |
| New Jersey                                                                                                                                                              | 247                                                   | 204-300                        | 10.67                                      | 40                                                      | 37.5                                                                                                                                      |
| New Mexico                                                                                                                                                              | 69                                                    | 56-85                          | 2.98                                       | 10                                                      | 33.6                                                                                                                                      |
| New York                                                                                                                                                                | 598                                                   | 516-693                        | 25.85                                      | 116                                                     | 44.9                                                                                                                                      |
| N Carolina                                                                                                                                                              | 350                                                   | 293-418                        | 15.12                                      | 42                                                      | 27.8                                                                                                                                      |
| N Dakota                                                                                                                                                                | 22                                                    | 18-27                          | 0.95                                       | 3                                                       | 31.6                                                                                                                                      |
| Ohio                                                                                                                                                                    | 459                                                   | 399-529                        | 19.8                                       | 57                                                      | 28.8                                                                                                                                      |
| Oklahoma                                                                                                                                                                | 124                                                   | 101-151                        | 5.36                                       | 17                                                      | 31.7                                                                                                                                      |
| Oregon                                                                                                                                                                  | 147                                                   | 120-179                        | 6.35                                       | 43                                                      | 67.7                                                                                                                                      |
| Pennsylvania                                                                                                                                                            | 397                                                   | 342-461                        | 17.15                                      | 46                                                      | 26.8                                                                                                                                      |

|               |       |              |       |      |       |
|---------------|-------|--------------|-------|------|-------|
| Rhode Island  | 37    | 30-46        | 1.60  | 11   | 68.8  |
| S Carolina    | 150   | 122-184      | 6.48  | 26   | 40.1  |
| S Dakota      | 26    | 21-32        | 1.12  | 19   | 169.6 |
| Tennessee     | 217   | 176-268      | 9.37  | 20   | 21.3  |
| Texas         | 654   | 566-755      | 28.3  | 121  | 42.8  |
| Utah          | 93    | 77-111       | 4.02  | 21   | 52.2  |
| Vermont       | 24    | 20-30        | 1.04  | 17   | 163.4 |
| Virginia      | 279   | 233-333      | 12.05 | 39   | 32.4  |
| Washington    | 239   | 196-292      | 10.32 | 30   | 29.1  |
| West Virginia | 78    | 63-96        | 3.37  | 13   | 38.6  |
| Wisconsin     | 175   | 141-217      | 7.56  | 66   | 87.3  |
| Wyoming       | 19    | 16-23        | 0.82  | 4    | 48.7  |
| Total U.S.    | 9,793 | 9,404-10,199 | 423.1 | 1720 | 40.7  |

<sup>a</sup>. Annual Averages Based on 2014 and 2015 National Survey on Drug Use and Health.

<sup>b</sup>. A reported 4.32% of adults with serious mental illness are eligible for assertive community treatment (Cuddeback, G.S., Morrissey, J.P., Meyer, P.S. How many assertive community treatment teams do we need? *Psychiatric Services* 57(12) 1803-06. 2006).

<sup>c</sup>. Based on SAMHSA's 2015 National Mental Health Services Survey.

<sup>d</sup>. Assuming ACT capacity of 100 clients
